# Supplementary material for: Metagenomic Characterization of Microbial Pollutants and Antibiotic- and Metal-Resistance Genes in Sediments from the Canals of Venice
Source: MDPI journal article supplement (doi:10.3390/w14071161), 2022-04-04
Supplement: s1 [file s1]

Archive with 1 entries (1 files):
- water-1658187-supplementary.pdf
